# Supplementary material for: Ferulic Acid Esterase Producing Lactobacillus johnsonii from Goat Feces as Corn Silage Inoculants
Source: MDPI journal article supplement (doi:10.3390/microorganisms10091732), 2022-08-27
Supplement: s1 [file s1]

**Supplementary Table S1.** % Identity matrix of the partial 16S RNAr sequences between isolated and reference strains.

| Accession ID | Strain | <i>L. johnsonii</i> | <i>L. taiwanensis</i> | <i>L. gasseri</i> |
|--------------|--------|---------------------|-----------------------|-------------------|
|              |        | GHZ10a              | CLG01                 | BIO6369           |
|              |        | CP062068.1          | CP059276.1            | WBOA01000001.1    |
| MT579619     | ETC150 | 99.56               | 99.56                 | 99.56             |
| MT579620     | ETC175 | 98.48               | 98.26                 | 98.26             |
| MT579621     | ETC187 | 99.35               | 99.35                 | 98.49             |
