# Supplementary material for: Ferulic Acid Esterase Producing Lactobacillus johnsonii from Goat Feces as Corn Silage Inoculants
Source: MDPI journal article supplement (doi:10.3390/microorganisms10091732), 2022-08-27
Supplement: s1 [file s1]

**Supplementary Table S2.** % Identity matrix of the *pheS* gene sequences between isolated and reference strains.

| Divergence                                                 | ETC150 | ETC175 | ETC187 | <i>Limosilactobacillus reuteri</i> PNG008 | <i>Lactobacillus delbrueckii</i> subsp. <i>jakobsenii</i> | <i>Lactobacillus delbrueckii</i> subsp. <i>delbrueckii</i> | <i>Lactobacillus jensenii</i> SNUV360 | <i>Lactobacillus iners</i> LI335 | <i>Lactobacillus johnsonii</i> GHZ10a | <i>Lactobacillus taiwanensis</i> CLG01 | <i>Lactobacillus gasserii</i> BIO6369 | <i>Lactobacillus crispatus</i> DC21.1 | <i>Lactobacillus helveticus</i> DSM 20075 | <i>Lactobacillus acidophilus</i> La-14 | <i>Lactobacillus amylovorus</i> GRL1118 |
|------------------------------------------------------------|--------|--------|--------|-------------------------------------------|-----------------------------------------------------------|------------------------------------------------------------|---------------------------------------|----------------------------------|---------------------------------------|----------------------------------------|---------------------------------------|---------------------------------------|-------------------------------------------|----------------------------------------|-----------------------------------------|
| ETC150                                                     | 100.00 | 83.84  | 93.28  | 50.30                                     | 56.63                                                     | 56.02                                                      | 64.46                                 | 60.24                            | 96.99                                 | 86.75                                  | 88.25                                 | 68.67                                 | 68.07                                     | 71.08                                  | 67.77                                   |
| ETC175                                                     | 83.84  | 100.00 | 84.08  | 52.27                                     | 58.31                                                     | 57.70                                                      | 61.33                                 | 60.12                            | 83.38                                 | 85.80                                  | 83.69                                 | 69.18                                 | 70.09                                     | 71.90                                  | 69.18                                   |
| ETC187                                                     | 93.28  | 84.08  | 100.00 | 51.86                                     | 59.63                                                     | 59.01                                                      | 65.84                                 | 60.87                            | 95.03                                 | 89.13                                  | 89.13                                 | 68.01                                 | 68.01                                     | 71.74                                  | 69.25                                   |
| <i>Limosilactobacillus reuteri</i> PNG008                  | 50.30  | e      | 51.86  | 100.00                                    | 59.03                                                     | 58.83                                                      | 62.56                                 | 61.13                            | 63.13                                 | 62.56                                  | 61.51                                 | 61.13                                 | 62.66                                     | 61.70                                  | 61.51                                   |
| <i>Lactobacillus delbrueckii</i> subsp. <i>jakobsenii</i>  | 56.63  | 58.31  | 59.63  | 59.03                                     | 100.00                                                    | 99.24                                                      | 68.76                                 | 62.19                            | 66.67                                 | 66.86                                  | 66.76                                 | 70.67                                 | 69.33                                     | 68.76                                  | 71.24                                   |
| <i>Lactobacillus delbrueckii</i> subsp. <i>delbrueckii</i> | 56.02  | 57.70  | 59.01  | 58.83                                     | 99.24                                                     | 100.00                                                     | 68.67                                 | 62.10                            | 66.19                                 | 66.76                                  | 66.29                                 | 70.29                                 | 68.86                                     | 68.29                                  | 70.86                                   |
| <i>Lactobacillus jensenii</i> SNUV360                      | 64.46  | 61.33  | 65.84  | 62.56                                     | 68.76                                                     | 68.67                                                      | 100.00                                | 72.19                            | 74.19                                 | 73.81                                  | 73.43                                 | 73.24                                 | 72.95                                     | 73.43                                  | 72.19                                   |
| <i>Lactobacillus iners</i> LI335                           | 60.24  | 60.12  | 60.87  | 61.13                                     | 62.19                                                     | 62.10                                                      | 72.19                                 | 100.00                           | 74.38                                 | 74.67                                  | 74.10                                 | 70.57                                 | 72.10                                     | 72.86                                  | 70.95                                   |
|                                                            | 96.99  | 83.38  | 95.03  | 63.13                                     | 66.67                                                     | 66.19                                                      | 74.19                                 | 74.38                            | 100.00                                | 89.81                                  | 89.71                                 | 78.76                                 | 80.76                                     | 80.38                                  | 78.67                                   |

|                                              |       |       |       |       |       |       |       |       |       |        |        |        |        |        |        |
|----------------------------------------------|-------|-------|-------|-------|-------|-------|-------|-------|-------|--------|--------|--------|--------|--------|--------|
| <i>Lactobacillus johnsonii</i><br>GHZ10a     |       |       |       |       |       |       |       |       |       |        |        |        |        |        |        |
| <i>Lactobacillus taiwanensis</i><br>CLG01    | 86.75 | 85.80 | 89.13 | 62.56 | 66.86 | 66.76 | 73.81 | 74.67 | 89.81 | 100.00 | 90.57  | 79.33  | 80.48  | 79.43  | 79.24  |
| <i>Lactobacillus gasseri</i><br>BIO6369      | 88.25 | 83.69 | 89.13 | 61.51 | 66.76 | 66.29 | 73.43 | 74.10 | 89.71 | 90.57  | 100.00 | 79.90  | 81.62  | 79.90  | 79.52  |
| <i>Lactobacillus crispatus</i><br>DC21.1     | 68.67 | 69.18 | 68.01 | 61.13 | 70.67 | 70.29 | 73.24 | 70.57 | 78.76 | 79.33  | 79.90  | 100.00 | 85.33  | 85.52  | 85.62  |
| <i>Lactobacillus helveticus</i><br>DSM 20075 | 68.07 | 70.09 | 68.01 | 62.66 | 69.33 | 68.86 | 72.95 | 72.10 | 80.76 | 80.48  | 81.62  | 85.33  | 100.00 | 86.57  | 87.05  |
| <i>Lactobacillus acidophilus</i><br>La-14    | 71.08 | 71.90 | 71.74 | 61.70 | 68.76 | 68.29 | 73.43 | 72.86 | 80.38 | 79.43  | 79.90  | 85.52  | 86.57  | 100.00 | 88.19  |
| <i>Lactobacillus amylovorus</i><br>GRL1118   | 67.77 | 69.18 | 69.25 | 61.51 | 71.24 | 70.86 | 72.19 | 70.95 | 78.67 | 79.24  | 79.52  | 85.62  | 87.05  | 88.19  | 100.00 |
