# Supplementary material for: Ferulic Acid Esterase Producing Lactobacillus johnsonii from Goat Feces as Corn Silage Inoculants
Source: MDPI journal article supplement (doi:10.3390/microorganisms10091732), 2022-08-27
Supplement: s1 [file s1]

Supplementary Table S6. General probiotic characterization of isolated strains.

|                                                  | ETC150   | ETC175 | ETC187   |
|--------------------------------------------------|----------|--------|----------|
| <b>Growth in MRS broth at/in</b>                 |          |        |          |
| 15°C                                             | -        | -      | -        |
| 45°C                                             | w        | w      | w        |
| 4% NaCl                                          | +        | +      | +        |
| pH 3.0                                           | w        | w      | w        |
| <b>Auto-aggregation (%)<sup>1</sup></b>          | 37 ± 5*  | 30 ± 3 | 35 ± 5   |
| <b>Hydrophobicity index (%)<sup>1</sup></b>      | 35 ± 8   | 30 ± 5 | 31 ± 6   |
| <b>Survival to simulated GIT (%)<sup>1</sup></b> | 77 ± 1.3 | 75 ± 2 | 90 ± 1.2 |

(-): Negative growth in tested conditions,  $\Delta DO$  [ $DO_{24h} - DO_{initial}$ ]  $\leq 0.2$ ; (+): Positive growth.  $\Delta DO \geq 0.5$ ; w: week growth,  $\Delta DO = 0.21 - 0.49$ . <sup>1</sup>Calculated according to the reference techniques equations. (\*): mean  $\pm$  SD.
