# Supplementary material for: Ferulic Acid Esterase Producing Lactobacillus johnsonii from Goat Feces as Corn Silage Inoculants
Source: MDPI journal article supplement (doi:10.3390/microorganisms10091732), 2022-08-27
Supplement: s1 [file s1]

**Supplementary Table S3.** % Identity matrix of the *gyrB* gene sequences between isolated and reference strains.

| Divengence                                                 | <i>Limosilactobacillus reuteri</i> PNG008 | <i>Lactobacillus delbrueckii</i> subsp. <i>jakobsenii</i> | <i>Lactobacillus delbrueckii</i> subsp. <i>delbrueckii</i> | <i>Lactobacillus iners</i> LEAF 2052A-d | ETC1 75 | <i>Lactobacillus taiwanensis</i> CLG01 | <i>Lactobacillus gasserii</i> BIO6369 | <i>Lactobacillus johnsonii</i> GHZ10a | ETC1 50 | ETC1 87 | <i>Lactobacillus jensenii</i> ATCC 25258 | <i>Lactobacillus acidophilus</i> La-14 | <i>Lactobacillus amylovorus</i> GRL1118 | <i>Lactobacillus helveticus</i> DSM 20075 | <i>Lactobacillus crispatus</i> DC21.1 |
|------------------------------------------------------------|-------------------------------------------|-----------------------------------------------------------|------------------------------------------------------------|-----------------------------------------|---------|----------------------------------------|---------------------------------------|---------------------------------------|---------|---------|------------------------------------------|----------------------------------------|-----------------------------------------|-------------------------------------------|---------------------------------------|
| <i>Limosilactobacillus reuteri</i> PNG008                  | 100.00                                    | 65.73                                                     | 65.83                                                      | 68.02                                   | 68.27   | 69.12                                  | 68.54                                 | 68.75                                 | 69.86   | 69.70   | 69.80                                    | 67.97                                  | 68.18                                   | 67.66                                     | 67.81                                 |
| <i>Lactobacillus delbrueckii</i> subsp. <i>jakobsenii</i>  | 65.73                                     | 100.00                                                    | 99.75                                                      | 67.69                                   | 67.39   | 72.43                                  | 72.27                                 | 72.27                                 | 71.25   | 70.86   | 74.44                                    | 72.32                                  | 74.77                                   | 73.70                                     | 74.11                                 |
| <i>Lactobacillus delbrueckii</i> subsp. <i>delbrueckii</i> | 65.83                                     | 99.75                                                     | 100.00                                                     | 67.74                                   | 67.63   | 72.43                                  | 72.38                                 | 72.38                                 | 71.50   | 71.11   | 74.59                                    | 72.32                                  | 74.82                                   | 73.75                                     | 74.16                                 |
| <i>Lactobacillus iners</i> LEAF 2052A-d                    | 68.02                                     | 67.69                                                     | 67.74                                                      | 100.00                                  | 74.10   | 75.59                                  | 75.03                                 | 75.23                                 | 75.43   | 75.06   | 75.66                                    | 75.38                                  | 75.23                                   | 75.64                                     | 75.08                                 |
| ETC175                                                     | 68.27                                     | 67.39                                                     | 67.63                                                      | 74.10                                   | 100.00  | 87.23                                  | 86.05                                 | 85.82                                 | 88.05   | 87.56   | 73.72                                    | 73.10                                  | 73.57                                   | 75.48                                     | 74.29                                 |
| <i>Lactobacillus taiwanensis</i> CLG01                     | 69.12                                     | 72.43                                                     | 72.43                                                      | 75.59                                   | 87.23   | 100.00                                 | 88.67                                 | 90.19                                 | 91.95   | 91.97   | 77.35                                    | 81.58                                  | 81.12                                   | 81.27                                     | 79.90                                 |
| <i>Lactobacillus gasserii</i> BIO6369                      | 68.54                                     | 72.27                                                     | 72.38                                                      | 75.03                                   | 86.05   | 88.67                                  | 100.00                                | 90.50                                 | 92.68   | 92.21   | 77.91                                    | 81.48                                  | 80.41                                   | 81.98                                     | 80.20                                 |
| <i>Lactobacillus johnsonii</i> GHZ10a                      | 68.75                                     | 72.27                                                     | 72.38                                                      | 75.23                                   | 85.82   | 90.19                                  | 90.50                                 | 100.00                                | 98.05   | 98.05   | 77.10                                    | 81.98                                  | 81.53                                   | 82.09                                     | 81.07                                 |

|                                              |       |       |       |       |       |       |       |       |            |            |        |        |        |        |        |
|----------------------------------------------|-------|-------|-------|-------|-------|-------|-------|-------|------------|------------|--------|--------|--------|--------|--------|
| ETC150                                       | 69.86 | 71.25 | 71.50 | 75.43 | 88.05 | 91.95 | 92.68 | 98.05 | 100.0<br>0 | 98.53      | 76.31  | 77.07  | 75.85  | 78.54  | 77.32  |
| ETC187                                       | 69.70 | 70.86 | 71.11 | 75.06 | 87.56 | 91.97 | 92.21 | 98.05 | 98.53<br>0 | 100.0<br>0 | 76.69  | 76.96  | 75.74  | 77.94  | 76.72  |
| <i>Lactobacillus jensenii</i><br>ATCC 25258  | 69.80 | 74.44 | 74.59 | 75.66 | 73.72 | 77.35 | 77.91 | 77.10 | 76.31      | 76.69      | 100.00 | 77.71  | 78.43  | 77.66  | 79.40  |
| <i>Lactobacillus acidophilus</i><br>La-14    | 67.97 | 72.32 | 72.32 | 75.38 | 73.10 | 81.58 | 81.48 | 81.98 | 77.07      | 76.96      | 77.71  | 100.00 | 86.87  | 86.51  | 84.73  |
| <i>Lactobacillus amylovorus</i><br>GRL1118   | 68.18 | 74.77 | 74.82 | 75.23 | 73.57 | 81.12 | 80.41 | 81.53 | 75.85      | 75.74      | 78.43  | 86.87  | 100.00 | 86.06  | 86.46  |
| <i>Lactobacillus helveticus</i><br>DSM 20075 | 67.66 | 73.70 | 73.75 | 75.64 | 75.48 | 81.27 | 81.98 | 82.09 | 78.54      | 77.94      | 77.66  | 86.51  | 86.06  | 100.00 | 86.51  |
| <i>Lactobacillus crispatus</i><br>DC21.1     | 67.81 | 74.11 | 74.16 | 75.08 | 74.29 | 79.90 | 80.20 | 81.07 | 77.32      | 76.72      | 79.40  | 84.73  | 86.46  | 86.51  | 100.00 |
