# Supplementary material for: Ferulic Acid Esterase Producing Lactobacillus johnsonii from Goat Feces as Corn Silage Inoculants
Source: MDPI journal article supplement (doi:10.3390/microorganisms10091732), 2022-08-27
Supplement: s1 [file s1]

**Supplementary Table S7.** Correlation of quantification methods for FAE activity using bacterial cell suspensions.

|           | <b>Spectrophotometric assay</b> | <b>HPLC assay</b> | <b>Agar diffusion</b> |
|-----------|---------------------------------|-------------------|-----------------------|
| <b>BL</b> | MF reduction (µM)               | FA (µM)           | Ø halo (mm)           |
| ETC150    | 27                              | 481               | 9.2                   |
| ETC175    | 25                              | 527               | 9.0                   |
| ETC187    | 53                              | 1090              | 15.5                  |
| CRL1446   | 35                              | 646               | 11.6                  |

  

| <b>Spectrophotometric assay</b> | <b>HPLC assay</b> | <b>Agar diffusion</b> | <b>R<sup>2</sup></b> |
|---------------------------------|-------------------|-----------------------|----------------------|
| MF reduction (µM)               | FA (µM)           |                       | 0.976                |
| MF reduction (µM)               |                   | Ø halo (mm)           | 0.990                |
|                                 | FA (µM)           | Ø halo (mm)           | 0.960                |

Average values (*n*=3) are shown.
