# Supplementary material for: Ferulic Acid Esterase Producing Lactobacillus johnsonii from Goat Feces as Corn Silage Inoculants
Source: MDPI journal article supplement (doi:10.3390/microorganisms10091732), 2022-08-27
Supplement: s1 [file s1]

**Supplementary Table S5.** % Identity matrix of the *pyrG* gene sequences between isolated and reference strains.

| Divergence                                                      | <i>Limosilactobacillus reuteri</i><br>PNG008 | <i>Lactobacillus delbrueckii</i><br>subsp.<br><i>jakobsenii</i> | <i>Lactobacillus jensenii</i><br>ATCC<br>25258 | <i>Lactobacillus iners</i><br>LI335 | ETC17<br>5 | <i>Lactobacillus johnsonii</i><br>GHZ10a | ETC15<br>0 | ETC18<br>7 | <i>Lactobacillus taiwanensis</i><br>CLG01 | <i>Lactobacillus gasseri</i><br>BIO6369 | <i>Lactobacillus crispatus</i><br>DC21.1 | <i>Lactobacillus helveticus</i><br>DSM<br>20075 | <i>Lactobacillus acidophilus</i><br>La-14 | <i>Lactobacillus amylovorus</i><br>GRL1118 |
|-----------------------------------------------------------------|----------------------------------------------|-----------------------------------------------------------------|------------------------------------------------|-------------------------------------|------------|------------------------------------------|------------|------------|-------------------------------------------|-----------------------------------------|------------------------------------------|-------------------------------------------------|-------------------------------------------|--------------------------------------------|
| <i>Limosilactobacillus reuteri</i><br>PNG008                    | 100.00                                       | 62.48                                                           | 68.98                                          | 65.54                               | 64.32      | 65.79                                    | 64.24      | 64.32      | 67.02                                     | 66.52                                   | 67.29                                    | 66.60                                           | 66.85                                     | 65.61                                      |
| <i>Lactobacillus delbrueckii</i><br>subsp.<br><i>jakobsenii</i> | 62.48                                        | 100.00                                                          | 68.89                                          | 68.09                               | 69.70      | 71.05                                    | 68.45      | 69.35      | 71.53                                     | 72.27                                   | 73.70                                    | 73.40                                           | 73.89                                     | 75.86                                      |
| <i>Lactobacillus jensenii</i> ATCC<br>25258                     | 68.98                                        | 68.89                                                           | 100.00                                         | 76.05                               | 75.52      | 77.65                                    | 76.25      | 76.11      | 77.83                                     | 78.13                                   | 77.78                                    | 78.70                                           | 78.33                                     | 77.41                                      |
| <i>Lactobacillus iners</i> LI335                                | 65.54                                        | 68.09                                                           | 76.05                                          | 100.00                              | 78.55      | 79.48                                    | 78.00      | 78.21      | 78.42                                     | 77.68                                   | 79.44                                    | 78.58                                           | 78.64                                     | 76.85                                      |
| ETC175                                                          | 64.32                                        | 69.70                                                           | 75.52                                          | 78.55                               | 100.00     | 89.98                                    | 90.09      | 89.82      | 89.50                                     | 90.20                                   | 82.87                                    | 85.08                                           | 83.68                                     | 83.80                                      |
| <i>Lactobacillus johnsonii</i><br>GHZ10a                        | 65.79                                        | 71.05                                                           | 77.65                                          | 79.48                               | 89.98      | 100.00                                   | 95.81      | 96.39      | 91.31                                     | 90.14                                   | 83.40                                    | 83.77                                           | 82.96                                     | 82.47                                      |
| ETC150                                                          | 64.24                                        | 68.45                                                           | 76.25                                          | 78.00                               | 90.09      | 95.81                                    | 100.00     | 97.78      | 90.33                                     | 89.63                                   | 82.54                                    | 84.17                                           | 83.12                                     | 82.07                                      |
| ETC187                                                          | 64.32                                        | 69.35                                                           | 76.11                                          | 78.21                               | 89.82      | 96.39                                    | 97.78      | 100.00     | 90.09                                     | 89.51                                   | 82.40                                    | 83.80                                           | 82.98                                     | 82.05                                      |
| <i>Lactobacillus taiwanensis</i><br>CLG01                       | 67.02                                        | 71.53                                                           | 77.83                                          | 78.42                               | 89.50      | 91.31                                    | 90.33      | 90.09      | 100.00                                    | 91.56                                   | 83.51                                    | 83.88                                           | 83.45                                     | 83.08                                      |
| <i>Lactobacillus gasseri</i><br>BIO6369                         | 66.52                                        | 72.27                                                           | 78.13                                          | 77.68                               | 90.20      | 90.14                                    | 89.63      | 89.51      | 91.56                                     | 100.00                                  | 83.94                                    | 84.31                                           | 83.88                                     | 83.69                                      |
| <i>Lactobacillus crispatus</i><br>DC21.1                        | 67.29                                        | 73.70                                                           | 77.78                                          | 79.44                               | 82.87      | 83.40                                    | 82.54      | 82.40      | 83.51                                     | 83.94                                   | 100.00                                   | 90.06                                           | 89.51                                     | 89.88                                      |
| <i>Lactobacillus helveticus</i> DSM<br>20075                    | 66.60                                        | 73.40                                                           | 78.70                                          | 78.58                               | 85.08      | 83.77                                    | 84.17      | 83.80      | 83.88                                     | 84.31                                   | 90.06                                    | 100.00                                          | 90.49                                     | 89.81                                      |
| <i>Lactobacillus acidophilus</i> La-<br>14                      | 66.85                                        | 73.89                                                           | 78.33                                          | 78.64                               | 83.68      | 82.96                                    | 83.12      | 82.98      | 83.45                                     | 83.88                                   | 89.51                                    | 90.49                                           | 100.00                                    | 91.23                                      |

|                                            |       |       |       |       |       |       |       |       |       |       |       |       |       |        |
|--------------------------------------------|-------|-------|-------|-------|-------|-------|-------|-------|-------|-------|-------|-------|-------|--------|
| <i>Lactobacillus amylovorus</i><br>GRL1118 | 65.61 | 75.86 | 77.41 | 76.85 | 83.80 | 82.47 | 82.07 | 82.05 | 83.08 | 83.69 | 89.88 | 89.81 | 91.23 | 100.00 |
|--------------------------------------------|-------|-------|-------|-------|-------|-------|-------|-------|-------|-------|-------|-------|-------|--------|
