# Supplementary material for: Ferulic Acid Esterase Producing Lactobacillus johnsonii from Goat Feces as Corn Silage Inoculants
Source: MDPI journal article supplement (doi:10.3390/microorganisms10091732), 2022-08-27
Supplement: s1 [file s1]

**Supplementary Table S4.** % Identity matrix of the *tuf* gene sequences between isolated and reference strains.

| Divergence                                                       | ETC1<br>75 | <i>Limosilactobacillus reuteri</i><br>PNG008 | <i>Lactobacillus delbrueckii</i><br>subsp.<br><i>jakobsenii</i> | <i>Lactobacillus delbrueckii</i><br>subsp.<br><i>delbrueckii</i> | <i>Lactobacillus iners</i><br>LI335 | <i>Lactobacillus crispatus</i><br>DC21.1 | <i>Lactobacillus acidophilus</i><br>La-14 | <i>Lactobacillus helveticus</i><br>DSM<br>20075 | <i>Lactobacillus amylovorus</i><br>GRL1118 | <i>Lactobacillus jensenii</i><br>ATCC<br>25258 | ETC1<br>50 | ETC1<br>87 | <i>Lactobacillus taiwanensis</i><br>CLG01 | <i>Lactobacillus gasseri</i><br>BIO6369 | <i>Lactobacillus johnsonii</i><br>GHZ10a |
|------------------------------------------------------------------|------------|----------------------------------------------|-----------------------------------------------------------------|------------------------------------------------------------------|-------------------------------------|------------------------------------------|-------------------------------------------|-------------------------------------------------|--------------------------------------------|------------------------------------------------|------------|------------|-------------------------------------------|-----------------------------------------|------------------------------------------|
| ETC175                                                           | 100.00     | 42.65                                        | 41.91                                                           | 41.91                                                            | 42.65                               | 40.44                                    | 40.44                                     | 41.18                                           | 41.18                                      | 40.44                                          | 37.90      | 41.88      | 41.91                                     | 41.91                                   | 41.18                                    |
| <i>Limosilactobacillus reuteri</i><br>PNG008                     | 42.65      | 100.00                                       | 80.44                                                           | 80.18                                                            | 81.02                               | 83.29                                    | 82.45                                     | 82.70                                           | 82.96                                      | 83.96                                          | 82.78      | 83.30      | 85.22                                     | 85.31                                   | 84.97                                    |
| <i>Lactobacillus delbrueckii</i><br>subsp.<br><i>jakobsenii</i>  | 41.91      | 80.44                                        | 100.00                                                          | 99.66                                                            | 82.79                               | 88.16                                    | 88.16                                     | 88.50                                           | 88.66                                      | 86.06                                          | 83.14      | 83.66      | 85.39                                     | 85.81                                   | 86.06                                    |
| <i>Lactobacillus delbrueckii</i><br>subsp.<br><i>delbrueckii</i> | 41.91      | 80.18                                        | 99.66                                                           | 100.00                                                           | 82.79                               | 87.99                                    | 87.99                                     | 88.33                                           | 88.50                                      | 86.23                                          | 83.05      | 83.57      | 85.31                                     | 85.73                                   | 85.98                                    |
| <i>Lactobacillus iners</i> LI335                                 | 42.65      | 81.02                                        | 82.79                                                           | 82.79                                                            | 100.00                              | 84.63                                    | 84.13                                     | 84.21                                           | 84.05                                      | 85.47                                          | 85.84      | 86.37      | 88.92                                     | 89.00                                   | 88.66                                    |
| <i>Lactobacillus crispatus</i><br>DC21.1                         | 40.44      | 83.29                                        | 88.16                                                           | 87.99                                                            | 84.63                               | 100.00                                   | 95.30                                     | 96.64                                           | 96.73                                      | 88.83                                          | 86.74      | 87.36      | 89.50                                     | 90.09                                   | 89.59                                    |
| <i>Lactobacillus acidophilus</i><br>La-14                        | 40.44      | 82.45                                        | 88.16                                                           | 87.99                                                            | 84.13                               | 95.30                                    | 100.00                                    | 96.56                                           | 96.89                                      | 89.84                                          | 85.66      | 86.10      | 88.41                                     | 89.08                                   | 88.50                                    |
| <i>Lactobacillus helveticus</i><br>DSM 20075                     | 41.18      | 82.70                                        | 88.50                                                           | 88.33                                                            | 84.21                               | 96.64                                    | 96.56                                     | 100.00                                          | 97.40                                      | 88.92                                          | 86.29      | 86.91      | 89.08                                     | 89.34                                   | 89.17                                    |
| <i>Lactobacillus amylovorus</i><br>GRL1118                       | 41.18      | 82.96                                        | 88.66                                                           | 88.50                                                            | 84.05                               | 96.73                                    | 96.89                                     | 97.40                                           | 100.00                                     | 89.34                                          | 86.02      | 86.64      | 88.66                                     | 89.34                                   | 88.92                                    |

|                                             |       |       |       |       |       |       |       |       |       |        |        |        |        |        |        |
|---------------------------------------------|-------|-------|-------|-------|-------|-------|-------|-------|-------|--------|--------|--------|--------|--------|--------|
| <i>Lactobacillus jensenii</i><br>ATCC 25258 | 40.44 | 83.96 | 86.06 | 86.23 | 85.47 | 88.83 | 89.84 | 88.92 | 89.34 | 100.00 | 87.83  | 88.36  | 90.18  | 90.34  | 90.60  |
| ETC150                                      | 37.90 | 82.78 | 83.14 | 83.05 | 85.84 | 86.74 | 85.66 | 86.29 | 86.02 | 87.83  | 100.00 | 98.00  | 95.13  | 95.13  | 96.84  |
| ETC187                                      | 41.88 | 83.30 | 83.66 | 83.57 | 86.37 | 87.36 | 86.10 | 86.91 | 86.64 | 88.36  | 98.00  | 100.00 | 95.49  | 95.49  | 97.20  |
| <i>Lactobacillus taiwanensis</i><br>CLG01   | 41.91 | 85.22 | 85.39 | 85.31 | 88.92 | 89.50 | 88.41 | 89.08 | 88.66 | 90.18  | 95.13  | 95.49  | 100.00 | 98.66  | 98.15  |
| <i>Lactobacillus gasseri</i><br>BIO6369     | 41.91 | 85.31 | 85.81 | 85.73 | 89.00 | 90.09 | 89.08 | 89.34 | 89.34 | 90.34  | 95.13  | 95.49  | 98.66  | 100.00 | 98.15  |
| <i>Lactobacillus johnsonii</i><br>GHZ10a    | 41.18 | 84.97 | 86.06 | 85.98 | 88.66 | 89.59 | 88.50 | 89.17 | 88.92 | 90.60  | 96.84  | 97.20  | 98.15  | 98.15  | 100.00 |
